# Supplementary material for: Well-defined electrochemical switching of amphiphilic glycolated poly(3,4-ethylenedioxythiophene)
Source: Royal Society of Chemistry journal article supplement (doi:10.1039/d2tc01448c), 2022-01-01
Supplement: d2tc01448c1.pdf [file d2tc01448c1.pdf]

Supporting Information for

*Well-defined electrochemical switching of amphiphilic glycolated poly(3,4-ethylenedioxythiophene)*

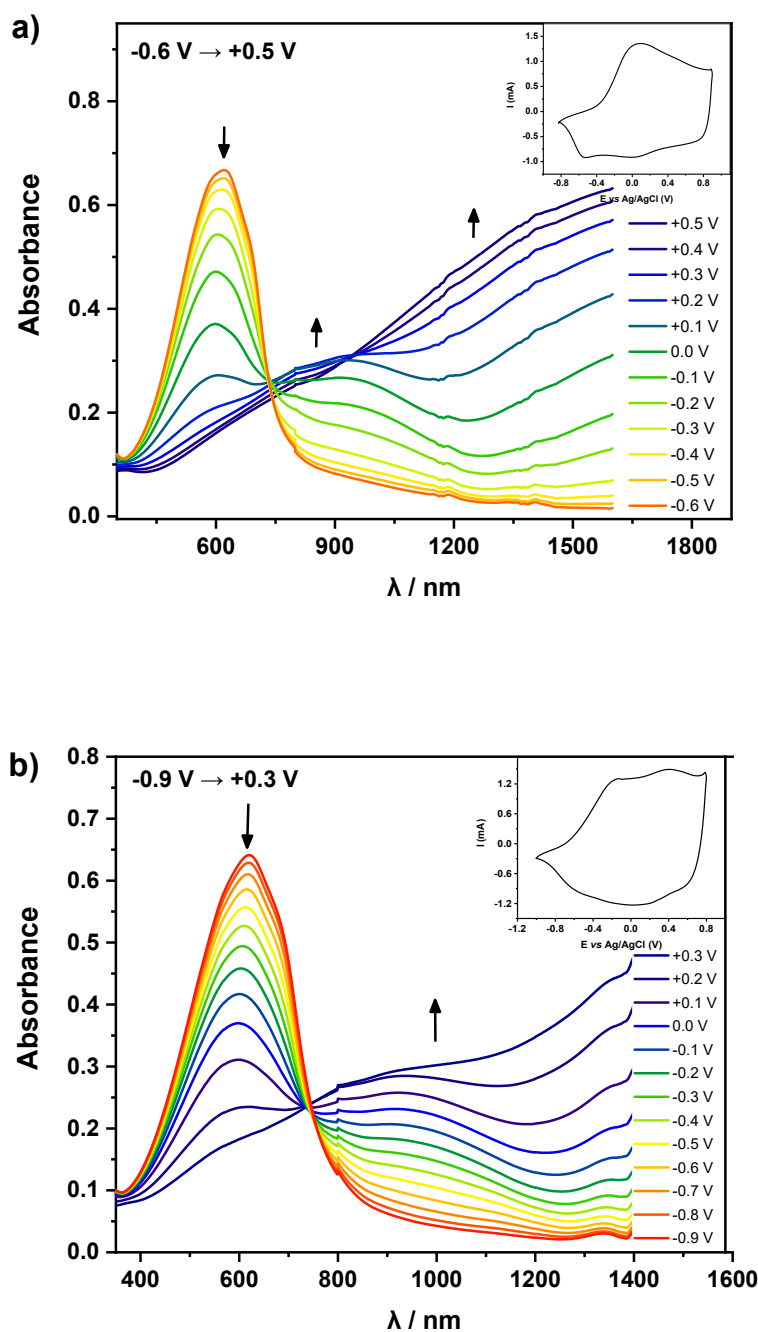

**Fig. S1.** CV scans and UV-vis-NIR spectra of thin films of PEDOT deposited on an ITO, recorded for increasing electrode potential from: -0.9 V to +0.2 V (a); -0.9 V to +0.3 V vs Ag/AgCl, under an inert atmosphere of argon (b). Electrolyte: 0.1 M TBAPF<sub>6</sub>/CH<sub>3</sub>CN (a) and 0.1 M KCl/H<sub>2</sub>O (b).

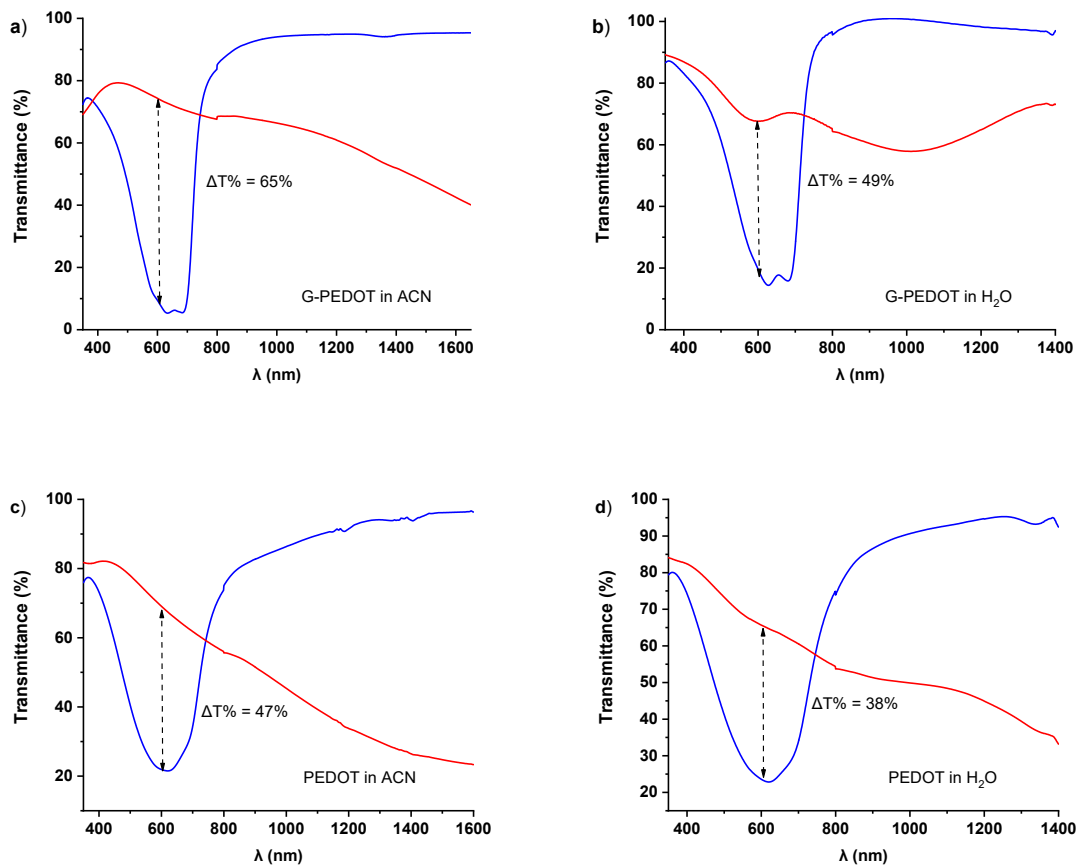

**Figure S2.** Transmittance spectra of the G-PEDOT and PEDOT in the colored (blue line) and the colorless states (red line) in organic (a, c) and aqueous solutions (b, d).

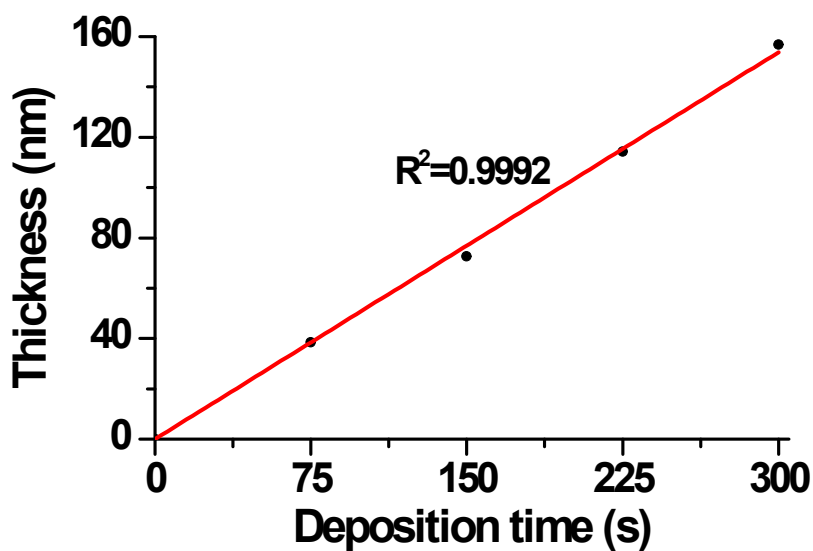

**Fig. S3.** Thickness dependence on the time of deposition by galvanostatic electropolymerization of G-PEDOT for the samples used for capacitance determination (0.05 cm<sup>2</sup>).

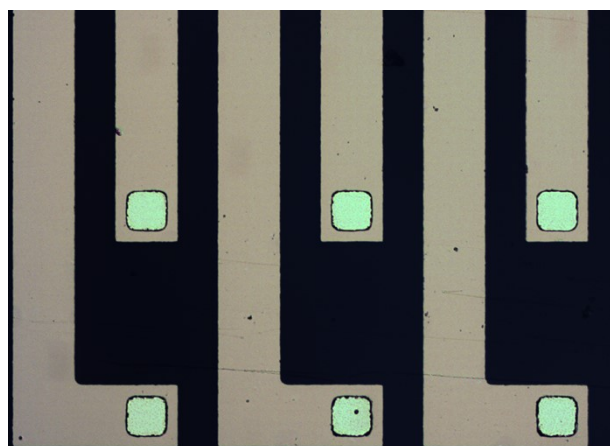

**Fig. S4.** Photomicrograph of test microelectrode arrays used in this work, with bare  $50 \times 50 \mu\text{m}$  exposed gold electrodes prior to electropolymerization.

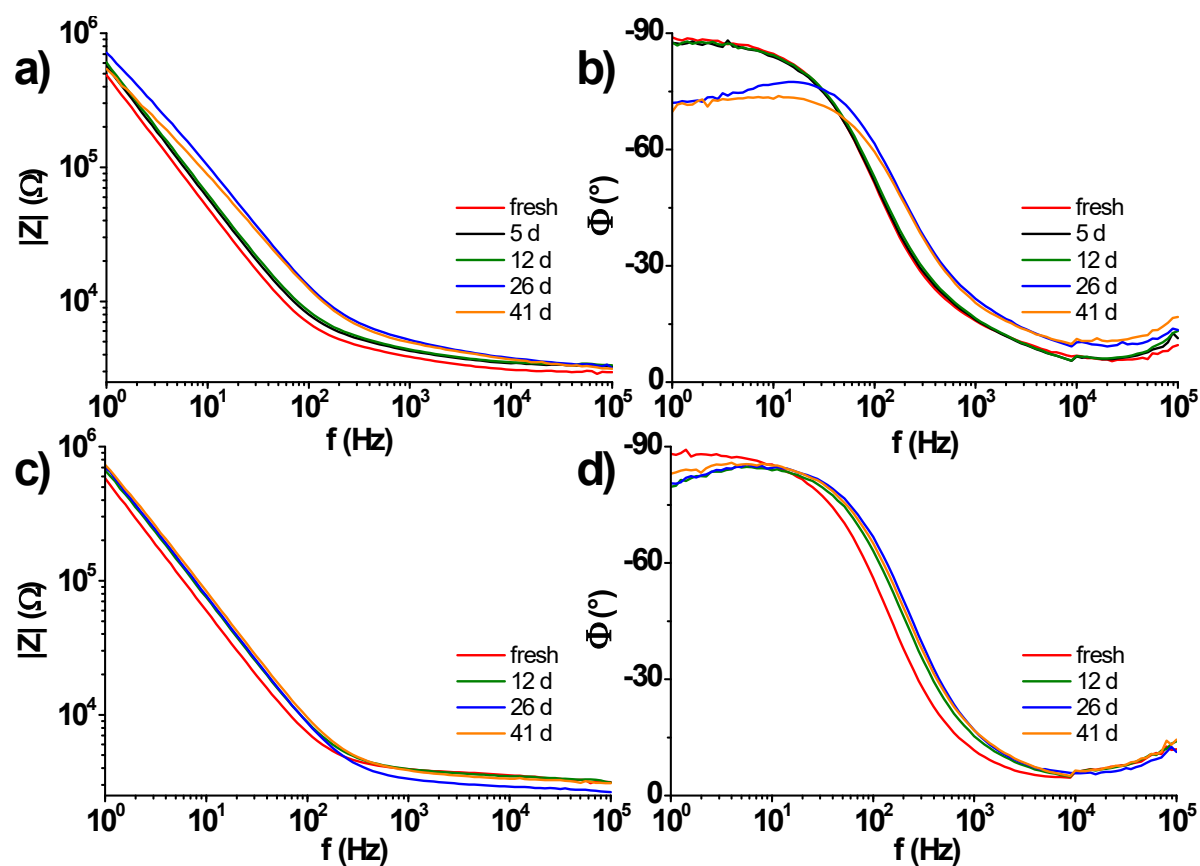

**Fig S5.** Electrochemical impedance spectra (Bode plots) of  $50 \times 50 \mu\text{m}$  microelectrodes, functionalized with PEDOT and G-PEDOT deposited via galvanostatic electropolymerization ( $4 \mu\text{C}$ :  $50 \text{ nA}$ ,  $80 \text{ s}$ ) recorded during accelerated aging test ( $60 \text{ }^\circ\text{C}$ , PBS solution). a) Impedance of G-PEDOT. b) Phase angle of G-PEDOT. c) Impedance of PEDOT. d) Phase angle of PEDOT. Plots shown in the figure are averaged over 2-3 different specimens.

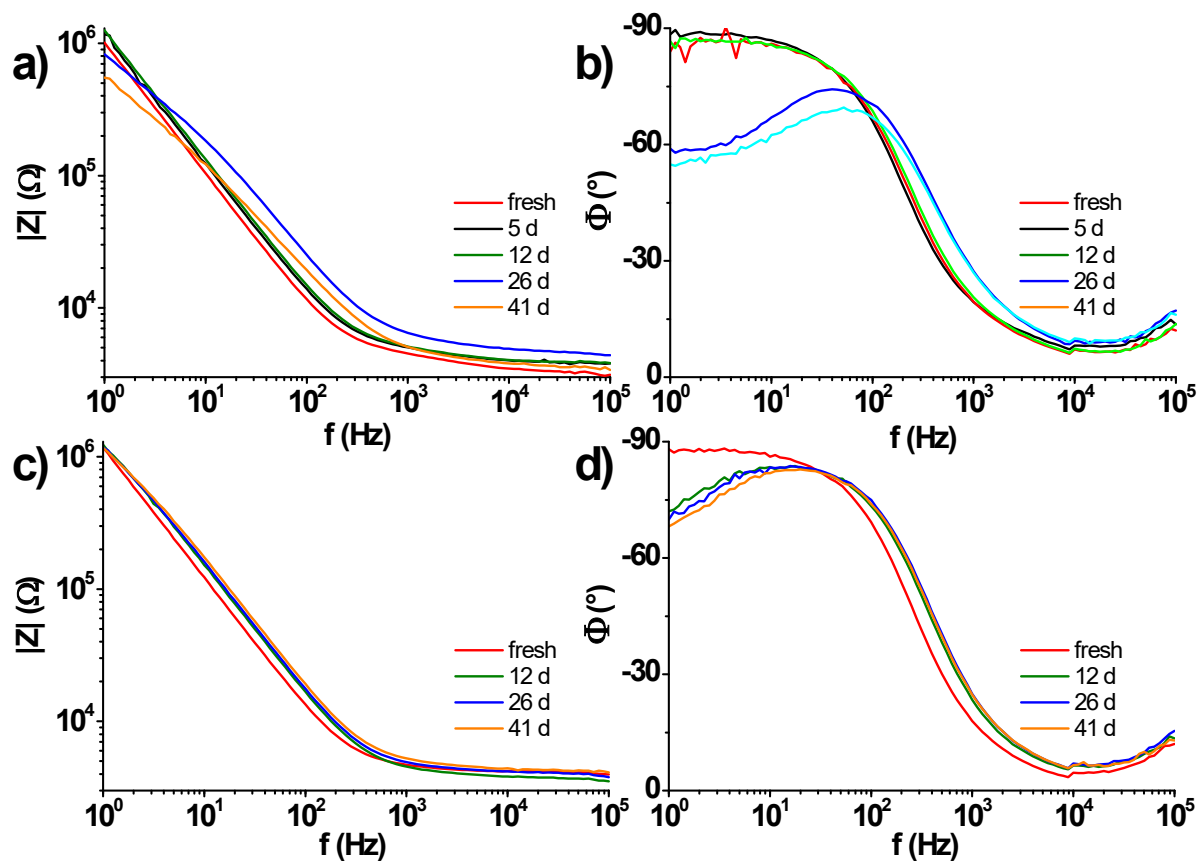

**Fig S6.** Electrochemical impedance spectra (Bode plots) of  $50 \times 50 \mu\text{m}$  microelectrodes, functionalized with PEDOT and G-PEDOT deposited via galvanostatic electropolymerization ( $2 \mu\text{C}$ :  $20 \text{ nA}$ ,  $100 \text{ s}$ ) recorded during accelerated aging test ( $60 \text{ }^\circ\text{C}$ , PBS solution). a) Impedance of G-PEDOT. b) Phase angle of G-PEDOT. c) Impedance of PEDOT. d) Phase angle of PEDOT. Plots shown in the figure are averaged over 2-3 different specimens.

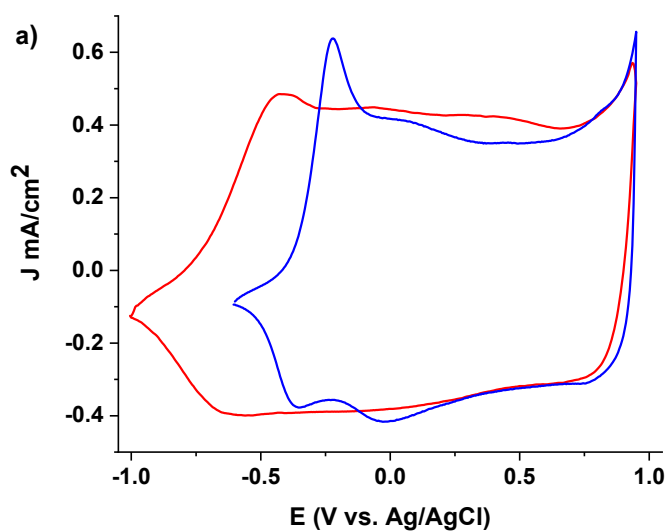

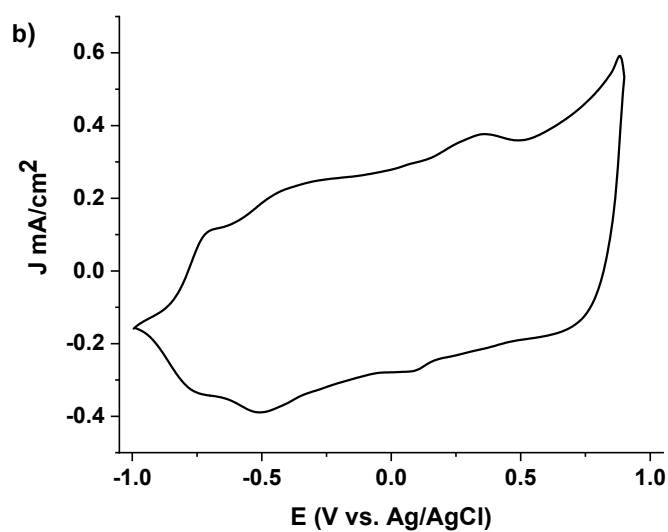

**Fig S7.** a) The comparison of cyclic voltammograms of the thin films of G-PEDOT and PEDOT galvanostatically deposited on the ITO electrode (electrolyte: deoxygenated 0.1M KCl, scan rate: 100 mV/s). Galvanostatic electrodeposition conditions were as follows: constant current 10  $\mu$ A (0.2 mA/cm<sup>2</sup> 150 s), ITO immersed in 0.1 M TBAPF<sub>6</sub>/CH<sub>3</sub>CN electrolyte containing 5 mM of G-EDOT or EDOT, respectively. b) Cyclic voltammograms of PEDOT:PSS thin films in 0.1 M KCl. Scans were performed with 100 mV/s rate, for PEDOT:PSS layer drop cast on ITO electrode.
